# Supplementary material for: Hollow TiO2/SiO2 composite microspheres through reactive assembly across immiscible liquid interfaces
Source: Royal Society of Chemistry journal article supplement (doi:10.1039/d2cp04756j), 2022-01-01
Supplement: d2cp04756j1.pdf [file d2cp04756j1.pdf]

## Supporting information for

### Hollow $\text{TiO}_2/\text{SiO}_2$ Composite Microspheres through Reactive Assembly across Immiscible Liquids Interface

Jitendra Bahadur<sup>1,3\*</sup>, J. Prakash<sup>2,3</sup>, Avik Das<sup>1</sup>, Debasis Sen<sup>1,3</sup>

<sup>1</sup>Solid State Physics Division, Bhabha Atomic Research Centre, Mumbai

<sup>2</sup>Materials Group, Bhabha Atomic Research Centre, Mumbai 400085, India

<sup>3</sup>Homi Bhabha National Institute, Anushaktinagar, Mumbai, 400094

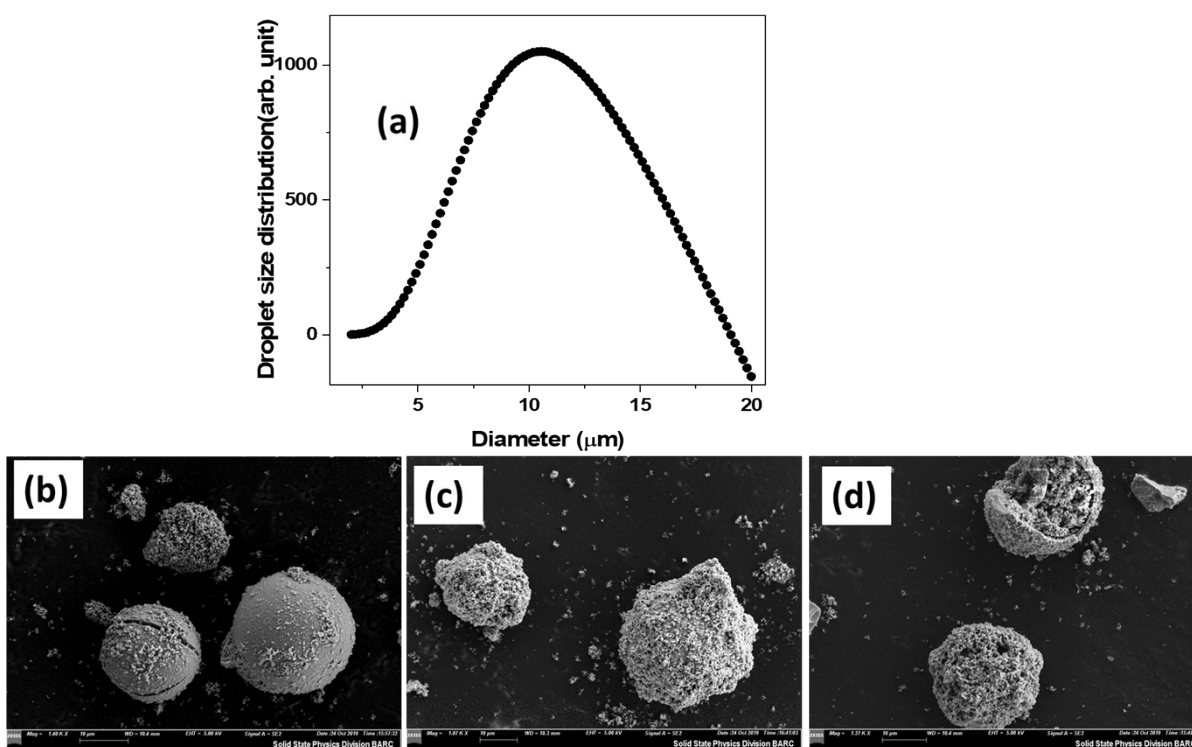

**Fig. S1** (a) Size distribution of the droplets generated by two-fluid nozzle at 2 Kg/cm<sup>2</sup>. The FESEM micrograph showing the size polydispersity of the (b) TS0 microsphere (c) Composite core-shell TS-SM5 microspheres (d) Composite core-shell TS-TM5 microspheres

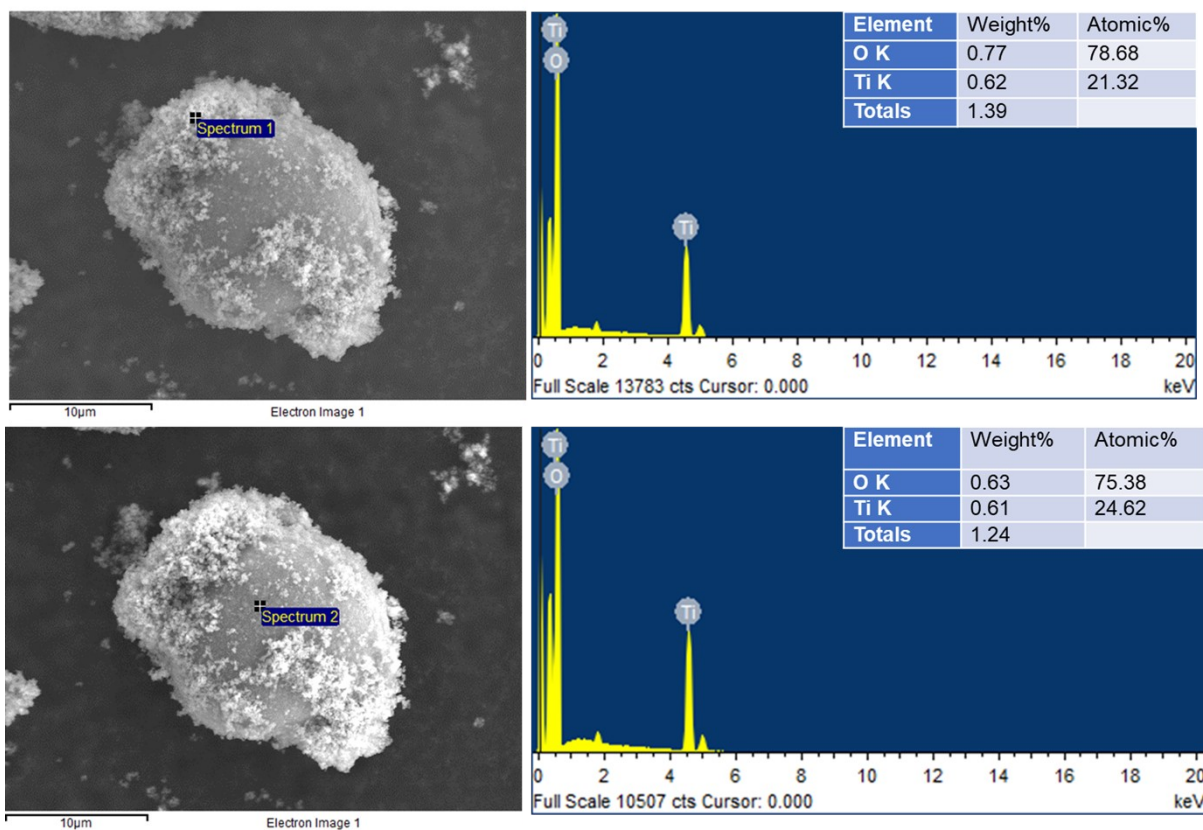

Fig. S2 The elemental analysis of the TiO<sub>2</sub> microspheres.

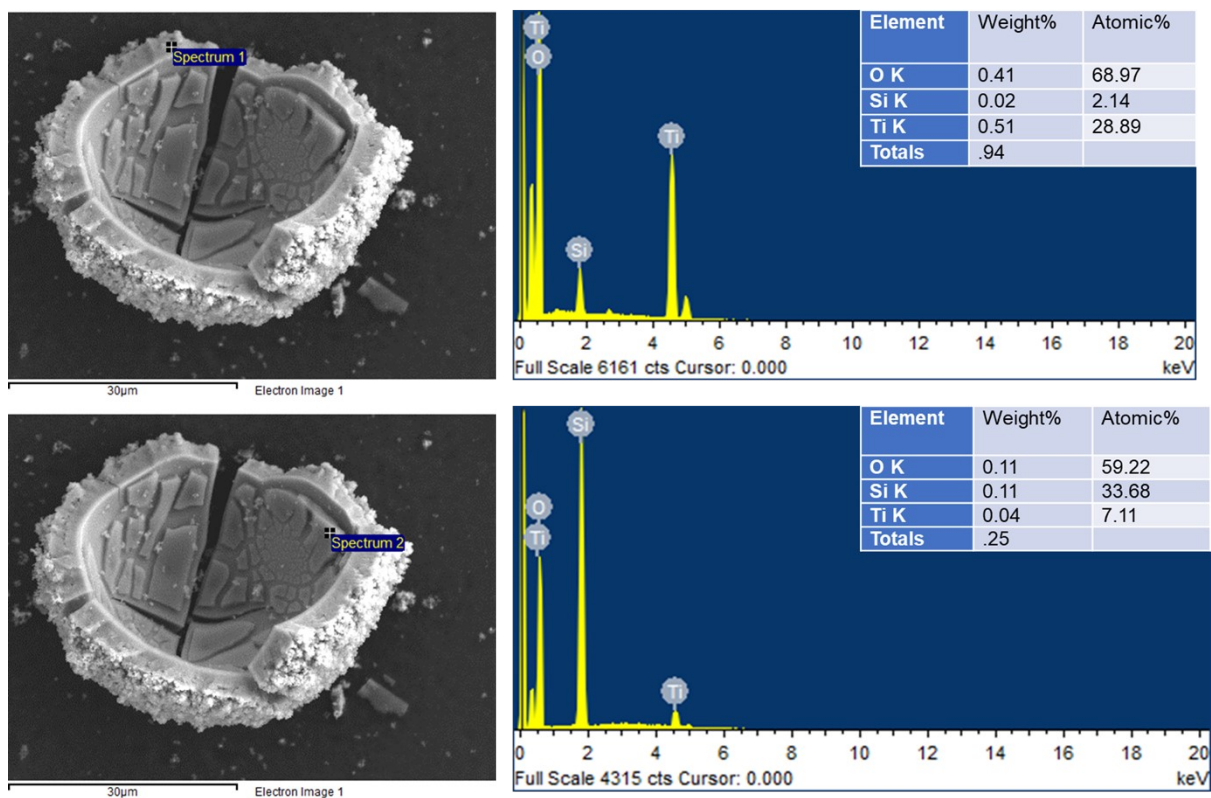

**Fig. S3** The elemental analysis of the  $\text{TiO}_2\text{-SiO}_2$  composite TS-SM5 microspheres.

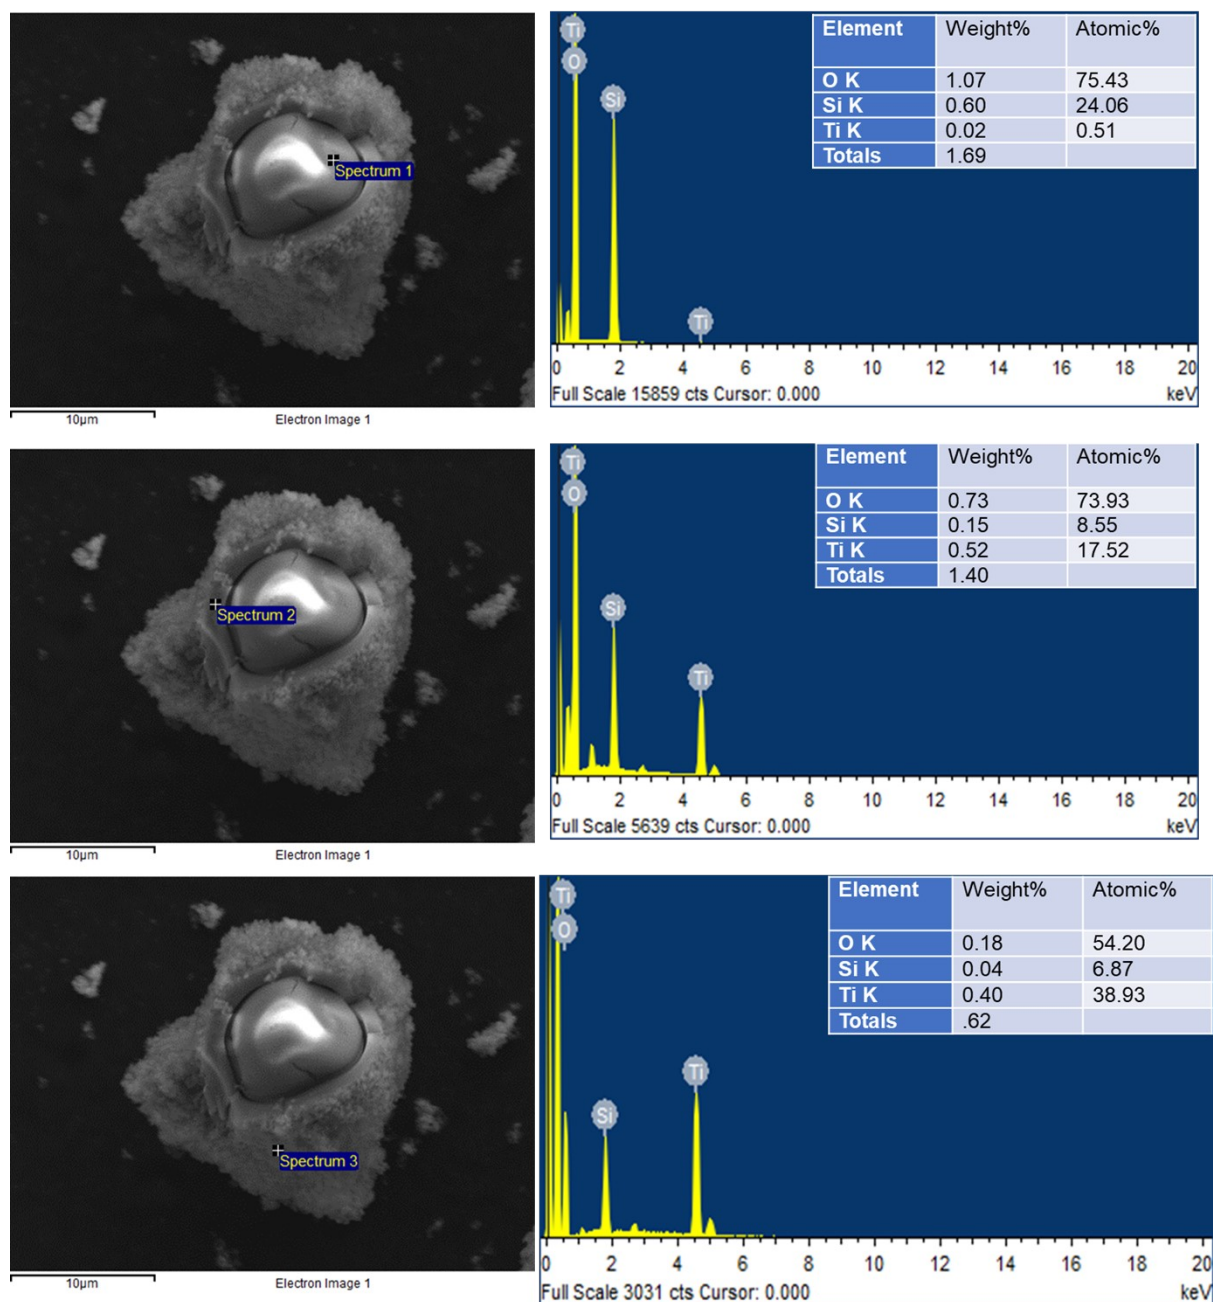

**Fig. S4** The elemental analysis of the  $\text{TiO}_2\text{-SiO}_2$  composite TS-TM5 microspheres.

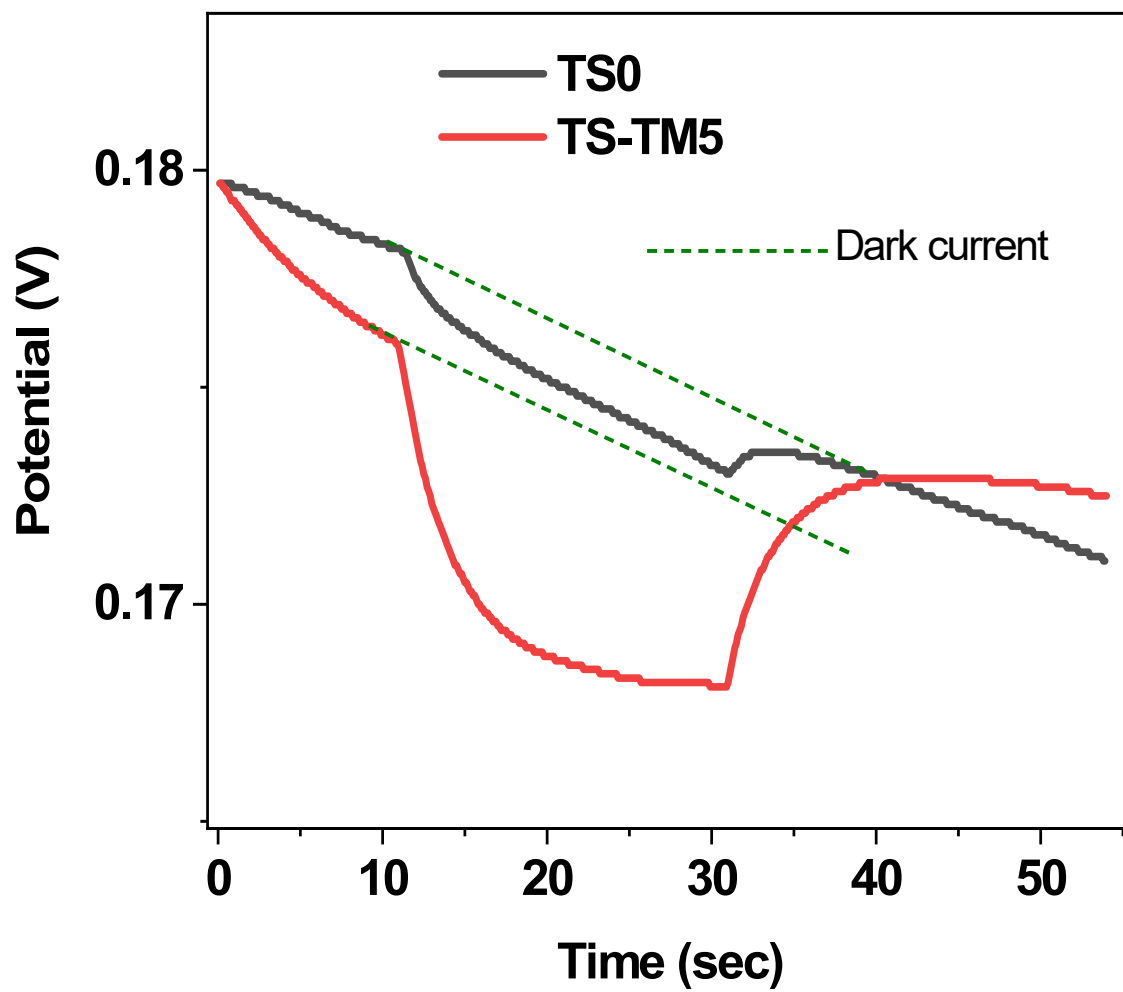

Fig. S5 Chrono-potentiometry plot for  $\text{TiO}_2\text{-SiO}_2$  composite TS-TM5 microspheres.
